# Supplementary material for: Design considerations for the bottom cell in perovskite/silicon tandems: a terawatt scalability perspective
Source: Royal Society of Chemistry journal article supplement (doi:10.1039/d3ee00952a), 2023-01-01
Supplement: d3ee00952a1.pdf [file d3ee00952a1.pdf]

# Design Considerations for the Bottom Cell in Perovskite / Silicon Tandems: A Terawatt Scalability Perspective

Matthew Wright <sup>†,a</sup>, Bruno Vicari Stefani <sup>†,b</sup>, Timothy W. Jones <sup>b</sup>, Brett Hallam <sup>c</sup>, Anastasia Soeriyadi <sup>a</sup>, Li Wang <sup>c</sup>, Pietro Altermatt <sup>a</sup>, Henry J. Snaith <sup>d</sup>, Gregory J. Wilson <sup>b</sup>, Ruy Sebastian Bonilla <sup>a</sup>

<sup>a</sup> Department of Materials, University of Oxford, Oxford, OX1 3PH, United Kingdom

<sup>b</sup> CSIRO Energy, Newcastle Energy Centre, 10 Murray Dwyer Circuit, Mayfield West NSW 2304, Australia

<sup>c</sup> School of Photovoltaic and Renewable Energy Engineering, The University of New South Wales, Kensington, NSW, 2052, Australia

<sup>d</sup> Clarendon Laboratory, Department of Physics, University of Oxford, Parks Road, Oxford, OX1 3PU, UK

\*Corresponding author e-mail: matthew.wright@materials.ox.ac.uk

<sup>†</sup> These authors contributed equally.

## Electronic supplementary information

Table S1 summarises cell and wafer information used to generate Figures 7 and 9. The reader is invited to explore an interactive data application available at <https://pvdata.csiro.au>.

| Author          | Cell technology | Wafer doping | Wafer type | Conversion efficiency [%] | Reference |
|-----------------|-----------------|--------------|------------|---------------------------|-----------|
| Albrecht et al. | SHJ             | n-type       | FZ         | 16.1                      | [1]       |
| Werner et al.   | homojunction    | n-type       | FZ         | 17.2                      | [2]       |
| Bush et al.     | SHJ             | n-type       | FZ         | 23.6                      | [3]       |
| Sahli et al.    | SHJ             | n-type       | FZ         | 22.7                      | [4]       |
| Sahli et al.    | SHJ             | n-type       | FZ         | 21.7                      | [4]       |
| Sahli et al.    | SHJ             | n-type       | FZ         | 16.8                      | [4]       |
| Wu et al.       | homojunction    | n-type       | FZ         | 22.8                      | [5]       |
| Fan et al.      | SHJ             | Not clear    | Not clear  | 18.56                     | [6]       |
| Werner et al.   | SHJ             | n-type       | FZ         | 17.2                      | [7]       |
| Werner et al.   | SHJ             | n-type       | FZ         | 19.5                      | [7]       |
| Werner et al.   | SHJ             | n-type       | FZ         | 18.1                      | [7]       |
| Werner et al.   | SHJ             | n-type       | FZ         | 21.4                      | [7]       |
| Sahli et al.    | SHJ             | n-type       | FZ         | 24.09                     | [8]       |
| Zheng et al.    | homojunction    | n-type       | FZ         | 19.1                      | [9]       |

|                              |                    |           |           |       |      |
|------------------------------|--------------------|-----------|-----------|-------|------|
| <b>Zheng et al.</b>          | homojunction       | n-type    | FZ        | 15.6  | [9]  |
| <b>Hoye et al.</b>           | homojunction       | p-type    | Not clear | 16.2  | [10] |
| <b>Zhu et al.</b>            | SHJ                | n-type    | FZ        | 23.73 | [11] |
| <b>Jost et al.</b>           | SHJ                | n-type    | FZ        | 23.1  | [12] |
| <b>Jost et al.</b>           | SHJ                | n-type    | FZ        | 25.4  | [12] |
| <b>Hou et al.</b>            | SHJ                | n-type    | FZ        | 21.23 | [13] |
| <b>Shen et al.</b>           | POLO/TOPCon        | n-type    | FZ        | 24    | [14] |
| <b>Zhu et al.</b>            | SHJ                | n-type    | Not clear | 16.86 | [15] |
| <b>Zhu et al.</b>            | SHJ                | n-type    | Not clear | 18.42 | [15] |
| <b>Hou et al.</b>            | SHJ                | n-type    | FZ        | 20.79 | [16] |
| <b>Chen et al.</b>           | SHJ                | n-type    | FZ        | 25.4  | [17] |
| <b>Mazzarella et al.</b>     | SHJ                | n-type    | FZ        | 25.34 | [18] |
| <b>Nogay et al.</b>          | POLO/TOPCon        | p-type    | FZ        | 24.92 | [19] |
| <b>Kim et al.</b>            | homojunction       | p-type    | Cz        | 21.02 | [20] |
| <b>Kohnen et al.</b>         | SHJ                | n-type    | FZ        | 24.95 | [21] |
| <b>Kohnen et al.</b>         | SHJ                | n-type    | FZ        | 26.02 | [21] |
| <b>Bett et al.</b>           | SHJ                | n-type    | FZ        | 21.1  | [22] |
| <b>Bett et al.</b>           | SHJ                | n-type    | FZ        | 19.4  | [22] |
| <b>Chen et al.</b>           | SHJ                | n-type    | Not clear | 26    | [23] |
| <b>Xu et al.</b>             | SHJ                | n-type    | FZ        | 26.94 | [24] |
| <b>Hou et al.</b>            | SHJ                | n-type    | FZ        | 25.58 | [25] |
| <b>Kim et al.</b>            | SHJ                | n-type    | FZ        | 26.7  | [26] |
| <b>Schulze et al.</b>        | SHJ                | p-type    | FZ        | 23.3  | [27] |
| <b>Subbiah et al.</b>        | SHJ                | n-type    | FZ        | 23.8  | [28] |
| <b>Aydin et al.</b>          | SHJ                | n-type    | FZ        | 24.6  | [29] |
| <b>Al-Ashouri et al.</b>     | SHJ                | n-type    | FZ        | 29    | [30] |
| <b>De Bastiani et al.</b>    | SHJ                | n-type    | FZ        | 25.1  | [31] |
| <b>Sutter et al.</b>         | SHJ                | n-type    | Not clear | 26.1  | [32] |
| <b>Mariotti et al.</b>       | POLO/TOPCon        | p-type    | Cz        | 21.29 | [33] |
| <b>Mariotti et al.</b>       | POLO/TOPCon        | p-type    | Cz        | 21.34 | [22] |
| <b>Kohnen et al.</b>         | SHJ                | n-type    | Cz        | 27.89 | [34] |
| <b>Kohnen et al.</b>         | SHJ                | n-type    | FZ        | 27.96 | [34] |
| <b>Wu et al.</b>             | POLO/TOPCon        | n-type    | Cz        | 27.45 | [35] |
| <b>Sveinbjörnsson et al.</b> | homojunction/POL O | Not clear | Not clear | 28.08 | [36] |
| <b>Mao et al.</b>            | SHJ                | n-type    | Cz        | 28.34 | [37] |
| <b>Wang et al.</b>           | SHJ                | n-type    | FZ        | 26.01 | [38] |

|                    |     |           |           |       |      |
|--------------------|-----|-----------|-----------|-------|------|
| Yang et al.        | SHJ | n-type    | Cz        | 28.52 | [39] |
| Luo et al.         | SHJ | n-type    | Cz        | 28.6  | [40] |
| Kamino et al.      | SHJ | n-type    | FZ        | 24.5  | [41] |
| De Bastiani et al. | SHJ | n-type    | FZ        | 27.8  | [42] |
| Harter et al.      | SHJ | n-type    | Cz        | 28.4  | [43] |
| Harter et al.      | SHJ | n-type    | FZ        | 27.11 | [43] |
| Harter et al.      | SHJ | n-type    | FZ        | 27.11 | [43] |
| Tockhorn et al.    | SHJ | n-type    | FZ        | 29.75 | [44] |
| Tockhorn et al.    | SHJ | n-type    | FZ        | 29.54 | [44] |
| Tockhorn et al.    | SHJ | n-type    | FZ        | 29.83 | [44] |
| EPFL/CSEM          | SHJ | Not clear | Not clear | 31.3  | [45] |
| Zheng et al.       | SHJ | n-type    | FZ        | 26.4  | [46] |
| Zheng et al.       | SHJ | n-type    | FZ        | 23.7  | [46] |
| Zheng et al.       | SHJ | n-type    | FZ        | 19.5  | [46] |

**Table S1:** Summary of silicon bottom cell technology, wafer type and wafer doping reported in the literature.

## References

- [1] S. Albrecht *et al.*, “Monolithic perovskite/silicon-heterojunction tandem solar cells processed at low temperature,” *Energy Environ. Sci.*, vol. 9, no. 1, pp. 81–88, 2016, doi: 10.1039/C5EE02965A.
- [2] J. Werner *et al.*, “Zinc tin oxide as high-temperature stable recombination layer for mesoscopic perovskite/silicon monolithic tandem solar cells,” *Appl. Phys. Lett.*, vol. 109, no. 23, p. 233902, Dec. 2016, doi: 10.1063/1.4971361.
- [3] K. A. Bush *et al.*, “23.6%-efficient monolithic perovskite/silicon tandem solar cells with improved stability,” *Nat Energy*, vol. 2, no. 4, p. 17009, Feb. 2017, doi: 10.1038/nenergy.2017.9.
- [4] F. Sahli *et al.*, “Improved Optics in Monolithic Perovskite/Silicon Tandem Solar Cells with a Nanocrystalline Silicon Recombination Junction,” *Adv. Energy Mater.*, vol. 8, no. 6, p. 1701609, Feb. 2018, doi: 10.1002/aenm.201701609.
- [5] Y. Wu *et al.*, “Monolithic perovskite/silicon-homojunction tandem solar cell with over 22% efficiency,” *Energy Environ. Sci.*, vol. 10, no. 11, pp. 2472–2479, 2017, doi: 10.1039/C7EE02288C.
- [6] R. Fan *et al.*, “Toward Full Solution Processed Perovskite/Si Monolithic Tandem Solar Device With PCE Exceeding 20%,” *Sol. RRL*, vol. 1, no. 11, p. 1700149, Nov. 2017, doi: 10.1002/solr.201700149.
- [7] J. Werner *et al.*, “Efficient Monolithic Perovskite/Silicon Tandem Solar Cell with Cell Area  $>1 \text{ cm}^2$ ,” *J. Phys. Chem. Lett.*, vol. 7, no. 1, pp. 161–166, Jan. 2016, doi: 10.1021/acs.jpcclett.5b02686.
- [8] F. Sahli *et al.*, “Fully textured monolithic perovskite/silicon tandem solar cells with 25.2% power conversion efficiency,” *Nature Mater*, vol. 17, no. 9, pp. 820–826, Sep. 2018, doi: 10.1038/s41563-018-0115-4.

- [9] J. Zheng *et al.*, “Large area efficient interface layer free monolithic perovskite/homo-junction-silicon tandem solar cell with over 20% efficiency,” *Energy Environ. Sci.*, vol. 11, no. 9, pp. 2432–2443, 2018, doi: 10.1039/C8EE00689J.
- [10] R. L. Z. Hoyer *et al.*, “Developing a Robust Recombination Contact to Realize Monolithic Perovskite Tandems With Industrially Common p-Type Silicon Solar Cells,” *IEEE J. Photovoltaics*, vol. 8, no. 4, pp. 1023–1028, Jul. 2018, doi: 10.1109/JPHOTOV.2018.2820509.
- [11] S. Zhu *et al.*, “Solvent Engineering to Balance Light Absorbance and Transmittance in Perovskite for Tandem Solar Cells,” *Sol. RRL*, vol. 2, no. 11, p. 1800176, Nov. 2018, doi: 10.1002/solr.201800176.
- [12] M. Jošt *et al.*, “Textured interfaces in monolithic perovskite/silicon tandem solar cells: advanced light management for improved efficiency and energy yield,” *Energy Environ. Sci.*, vol. 11, no. 12, pp. 3511–3523, 2018, doi: 10.1039/C8EE02469C.
- [13] F. Hou *et al.*, “Inverted pyramidally-textured PDMS antireflective foils for perovskite/silicon tandem solar cells with flat top cell,” *Nano Energy*, vol. 56, pp. 234–240, Feb. 2019, doi: 10.1016/j.nanoen.2018.11.018.
- [14] H. Shen *et al.*, “In situ recombination junction between p-Si and TiO<sub>2</sub> enables high-efficiency monolithic perovskite/Si tandem cells,” *Sci. Adv.*, vol. 4, no. 12, p. eaau9711, Dec. 2018, doi: 10.1126/sciadv.aau9711.
- [15] S. Zhu *et al.*, “Transparent electrode for monolithic perovskite/silicon-heterojunction two-terminal tandem solar cells,” *Nano Energy*, vol. 45, pp. 280–286, Mar. 2018, doi: 10.1016/j.nanoen.2017.12.043.
- [16] F. Hou *et al.*, “Monolithic Perovskite/Silicon-Heterojunction Tandem Solar Cells with Open-Circuit Voltage of over 1.8 V,” *ACS Appl. Energy Mater.*, vol. 2, no. 1, pp. 243–249, Jan. 2019, doi: 10.1021/acsaem.8b00926.
- [17] B. Chen *et al.*, “Grain Engineering for Perovskite/Silicon Monolithic Tandem Solar Cells with Efficiency of 25.4%,” *Joule*, vol. 3, no. 1, pp. 177–190, Jan. 2019, doi: 10.1016/j.joule.2018.10.003.
- [18] L. Mazzarella *et al.*, “Infrared Light Management Using a Nanocrystalline Silicon Oxide Interlayer in Monolithic Perovskite/Silicon Heterojunction Tandem Solar Cells with Efficiency above 25%,” *Adv. Energy Mater.*, vol. 9, no. 14, p. 1803241, Apr. 2019, doi: 10.1002/aenm.201803241.
- [19] G. Nogay *et al.*, “25.1%-Efficient Monolithic Perovskite/Silicon Tandem Solar Cell Based on a p-type Monocrystalline Textured Silicon Wafer and High-Temperature Passivating Contacts,” *ACS Energy Lett.*, vol. 4, no. 4, pp. 844–845, Apr. 2019, doi: 10.1021/acsenerylett.9b00377.
- [20] C. U. Kim *et al.*, “Optimization of device design for low cost and high efficiency planar monolithic perovskite/silicon tandem solar cells,” *Nano Energy*, vol. 60, pp. 213–221, Jun. 2019, doi: 10.1016/j.nanoen.2019.03.056.
- [21] E. Köhnen *et al.*, “Highly efficient monolithic perovskite silicon tandem solar cells: analyzing the influence of current mismatch on device performance,” *Sustainable Energy Fuels*, vol. 3, no. 8, pp. 1995–2005, 2019, doi: 10.1039/C9SE00120D.
- [22] A. J. Bett *et al.*, “Two-terminal Perovskite silicon tandem solar cells with a high-Bandgap Perovskite absorber enabling voltages over 1.8 V,” *Prog Photovolt Res Appl*, vol. 28, no. 2, pp. 99–110, Feb. 2020, doi: x
- [23] B. Chen *et al.*, “Blade-Coated Perovskites on Textured Silicon for 26%-Efficient Monolithic Perovskite/Silicon Tandem Solar Cells,” *Joule*, vol. 4, no. 4, pp. 850–864, Apr. 2020, doi: 10.1016/j.joule.2020.01.008.

- [24] J. Xu *et al.*, “Triple-halide wide-band gap perovskites with suppressed phase segregation for efficient tandems,” *Science*, vol. 367, no. 6482, pp. 1097–1104, Mar. 2020, doi: 10.1126/science.aaz5074.
- [25] Y. Hou *et al.*, “Efficient tandem solar cells with solution-processed perovskite on textured crystalline silicon,” *Science*, vol. 367, no. 6482, pp. 1135–1140, Mar. 2020, doi: 10.1126/science.aaz3691.
- [26] D. Kim *et al.*, “Efficient, stable silicon tandem cells enabled by anion-engineered wide-bandgap perovskites,” *Science*, vol. 368, no. 6487, pp. 155–160, Apr. 2020, doi: 10.1126/science.aba3433.
- [27] P. S. C. Schulze *et al.*, “25.1% High-Efficiency Monolithic Perovskite Silicon Tandem Solar Cell with a High Bandgap Perovskite Absorber,” *Sol. RRL*, vol. 4, no. 7, p. 2000152, Jul. 2020, doi: 10.1002/solr.202000152.
- [28] A. S. Subbiah *et al.*, “High-Performance Perovskite Single-Junction and Textured Perovskite/Silicon Tandem Solar Cells via Slot-Die-Coating,” *ACS Energy Lett.*, vol. 5, no. 9, pp. 3034–3040, Sep. 2020, doi: 10.1021/acsenergylett.0c01297.
- [29] E. Aydin *et al.*, “Interplay between temperature and bandgap energies on the outdoor performance of perovskite/silicon tandem solar cells,” *Nat Energy*, vol. 5, no. 11, pp. 851–859, Sep. 2020, doi: 10.1038/s41560-020-00687-4.
- [30] A. Al-Ashouri *et al.*, “Monolithic perovskite/silicon tandem solar cell with >29% efficiency by enhanced hole extraction,” *Science*, vol. 370, no. 6522, pp. 1300–1309, Dec. 2020, doi: 10.1126/science.abd4016.
- [31] M. De Bastiani *et al.*, “Efficient bifacial monolithic perovskite/silicon tandem solar cells via bandgap engineering,” *Nat Energy*, vol. 6, no. 2, pp. 167–175, Jan. 2021, doi: 10.1038/s41560-020-00756-8.
- [32] J. Sutter *et al.*, “Periodically Nanostructured Perovskite/Silicon Tandem Solar Cells with Power Conversion Efficiency Exceeding 26%,” in *2021 IEEE 48th Photovoltaic Specialists Conference (PVSC)*, Fort Lauderdale, FL, USA: IEEE, Jun. 2021, pp. 1034–1036. doi: 10.1109/PVSC43889.2021.9518715.
- [33] S. Mariotti *et al.*, “Monolithic Perovskite/Silicon Tandem Solar Cells Fabricated Using Industrial p-Type Polycrystalline Silicon on Oxide/Passivated Emitter and Rear Cell Silicon Bottom Cell Technology,” *Solar RRL*, vol. 6, no. 4, p. 2101066, Apr. 2022, doi: 10.1002/solr.202101066.
- [34] E. Köhnen *et al.*, “27.9% Efficient Monolithic Perovskite/Silicon Tandem Solar Cells on Industry Compatible Bottom Cells,” *Solar RRL*, vol. 5, no. 7, p. 2100244, Jul. 2021, doi: 10.1002/solr.202100244.
- [35] Y. Wu *et al.*, “27.6% Perovskite/c-Si Tandem Solar Cells Using Industrial Fabricated TOPCon Device,” *Advanced Energy Materials*, vol. 12, no. 27, p. 2200821, Jul. 2022, doi: 10.1002/aenm.202200821.
- [36] K. Sveinbjörnsson *et al.*, “Monolithic Perovskite/Silicon Tandem Solar Cell with 28.7% Efficiency Using Industrial Silicon Bottom Cells,” *ACS Energy Lett.*, vol. 7, no. 8, pp. 2654–2656, Aug. 2022, doi: 10.1021/acsenergylett.2c01358.
- [37] L. Mao *et al.*, “Fully Textured, Production-Line Compatible Monolithic Perovskite/Silicon Tandem Solar Cells Approaching 29% Efficiency,” *Advanced Materials*, vol. 34, no. 40, p. 2206193, Oct. 2022, doi: 10.1002/adma.202206193.
- [38] L. Wang *et al.*, “Strain Modulation for Light-Stable n-i-p Perovskite/Silicon Tandem Solar Cells,” *Advanced Materials*, vol. 34, no. 26, p. 2201315, Jul. 2022, doi: 10.1002/adma.202201315.
- [39] G. Yang *et al.*, “Defect engineering in wide-bandgap perovskites for efficient perovskite-silicon tandem solar cells,” *Nat. Photon.*, vol. 16, no. 8, pp. 588–594, Aug. 2022, doi: 10.1038/s41566-022-01033-8.

- [40] X. Luo *et al.*, “Efficient Perovskite/Silicon Tandem Solar Cells on Industrially Compatible Textured Silicon,” *Advanced Materials*, vol. 35, no. 9, p. 2207883, Mar. 2023, doi: 10.1002/adma.202207883.
- [41] B. A. Kamino *et al.*, “Low-Temperature Screen-Printed Metallization for the Scale-Up of Two-Terminal Perovskite–Silicon Tandems,” *ACS Appl. Energy Mater.*, vol. 2, no. 5, pp. 3815–3821, May 2019, doi: 10.1021/acsaem.9b00502.
- [42] M. De Bastiani *et al.*, “Monolithic Perovskite/Silicon Tandems with >28% Efficiency: Role of Silicon-Surface Texture on Perovskite Properties,” *Adv Funct Materials*, vol. 33, no. 4, p. 2205557, Jan. 2023, doi: 10.1002/adfm.202205557.
- [43] A. Harter, S. Mariotti, L. Korte, R. Schlattmann, S. Albrecht, and B. Stannowski, “Double-sided nano-textured surfaces for industry compatible high-performance silicon heterojunction and perovskite/silicon tandem solar cells,” *Progress in Photovoltaics*, p. pip.3685, Feb. 2023, doi: 10.1002/pip.3685.
- [44] P. Tockhorn *et al.*, “Nano-optical designs for high-efficiency monolithic perovskite–silicon tandem solar cells,” *Nat. Nanotechnol.*, vol. 17, no. 11, pp. 1214–1221, Nov. 2022, doi: 10.1038/s41565-022-01228-8.
- [45] M. A. Green *et al.*, “Solar cell efficiency tables (Version 61),” *Progress in Photovoltaics*, vol. 31, no. 1, pp. 3–16, Jan. 2023, doi: 10.1002/pip.3646.
- [46] J. Zheng *et al.*, “Efficient monolithic perovskite–Si tandem solar cells enabled by an ultra-thin indium tin oxide interlayer,” *Energy Environ. Sci.*, vol. 16, no. 3, pp. 1223–1233, 2023, doi: 10.1039/D2EE04007G.
